# Supplementary material for: Crystallization control and multisite passivation of perovskites with amino acid to boost the efficiency and stability of perovskite solar cells
Source: Royal Society of Chemistry journal article supplement (doi:10.1039/d0tc04186f), 2020-01-01
Supplement: d0tc04186f1.pdf [file d0tc04186f1.pdf]

# Crystallization control and multisite passivation of perovskites with amino acid to boost efficiency and stability of perovskite solar cells

Liuquan Zhang<sup>†,a</sup>, Kun Cao<sup>†,a</sup>, Jie Qian<sup>†,a</sup>, Yue Huang,<sup>a</sup> Xuxian Wang,<sup>b</sup> Mengru Ge,<sup>a</sup>  
Wei Shen,<sup>a</sup> Fei Huang,<sup>a</sup> Minghao Wang,<sup>a</sup> Wenzhu Zhang,<sup>a</sup> Shufen Chen<sup>\*a</sup> and Tianshi  
Qin<sup>\*b</sup>

<sup>a</sup> Key Laboratory for Organic Electronics and Information Displays & Jiangsu Key Laboratory for Biosensors, Institute of Advanced Materials (IAM), Jiangsu National Synergetic Innovation Center for Advanced Materials (SICAM), Nanjing University of Posts & Telecommunications, 9 Wenyuan Road, Nanjing 210023, China

<sup>b</sup> Key Laboratory of Flexible Electronics (KLOFE), Institute of Advanced Materials (IAM), Nanjing Tech University (NanjingTech), 5 Ximofan Road, Nanjing 210009, China

**Keywords:** Planar heterojunction perovskite, Solar cells, Additive, (s)-(-)-4-amino-2-hydroxybutyric acid

## Experimental section

*Materials:* Formamidinium iodide (FAI, 99.99%), PbI<sub>2</sub> (99.99%), AHBA (99.9%), lead dibromide (PbBr<sub>2</sub>, 99.99%) and poly[bis (4-phenyl)(2,4,6-trimethylphenyl)amine]

(PTAA,  $M_n = 6000-15000$ ) were purchased from Xi'an Polymer Light Technology Corp. Methylamium bromide (MABr, 99.5%) was purchased from Materwin Corp. Chlorobenzene (CB, anhydrous, 99.8%), toluene, ethyl acetate (EA, anhydrous, 99.8%), dimethyl sulfoxide (DMSO, anhydrous, 99.9%), *N,N*-dimethylformamide (DMF, anhydrous, 99.8%), cesium iodide (CsI, 99.5%) and bathocuproine (BCP, 99.9%) were purchased from Sigma-Aldrich. 2,3,5,6-tetrafluoro-7,7,8,8-tetracyanoquinodimethane ( $F_4$ -TCNQ, 99%) was purchased from Nichem. [6,6]-phenyl-C<sub>61</sub>-butyric acid methyl ester (PC<sub>61</sub>BM) and buckminsterfullerene (C<sub>60</sub>, 99%) were purchased from Nano-C Tech. All chemicals were used as received without further purification.

*Perovskite precursor solution:* The Cs<sub>0.03</sub>(FA<sub>0.85</sub>MA<sub>0.15</sub>)<sub>0.97</sub>Pb(I<sub>0.85</sub>Br<sub>0.15</sub>)<sub>3</sub> perovskite films were deposited from a precursor solution containing FAI (190.06 mg), PbI<sub>2</sub> (548.06 mg), MABr (21.84 mg), PbBr<sub>2</sub> (77.07 mg) and AHBA (X mg, X=0, 0.25, 0.5, 1) in anhydrous DMF (0.64 mL) and DMSO (0.16 mL). Then, the 35  $\mu$ L of CsI, predissolved as a 1.5 M stock solution in DMSO, was added to the mixed perovskite precursor to achieve the desired triple cation composition. Note that a small molar excess of PbI<sub>2</sub> (3.3%) in the precursor solution was used in this study to fabricate the perovskite active layers.

*Device Fabrication:* The ITO glasses were washed with acetone, ethanol and deionized water in sequence, followed by ultrasonic cleaning with deionized water, acetone and ethanol for 20 min. After drying with high purity N<sub>2</sub> and vacuum drying

in an oven, the ITO substrates were treated with UV-ozone for 30 min. Then the F<sub>4</sub>-TCNQ-doped PTAA solution (4 mg/mL in toluene doped with 0.25 wt% F<sub>4</sub>-TCNQ) was spin-coated onto the ITO substrates at 6000 rpm for 30 s, and then the samples were heated at 100 °C for 10 min in a N<sub>2</sub>-filled glovebox. To improve the wettability of perovskite precursor solution on the PTAA hole-extraction layer, the PTAA-coated ITO substrates were pre-treated by spin-coating 70 μL of DMF. Then perovskite precursor solution was spin-coated on the PTAA-coated ITO substrates at 6000 rpm for 30 s, and 100 μL EA was used as the anti-solvent to treat the perovskite films at the 25th s. Thereafter the samples were immediately annealed on a hotplate at 100 °C for 60 min. The electron transport material, PC<sub>61</sub>BM solution (10 mg mL<sup>-1</sup> in CB) was spin-coated on the top of perovskite layer at the speed of 1000 rpm for 45 s. Finally, C<sub>60</sub> (20 nm), BCP (9 nm) and Ag electrode (80 nm) were sequentially deposited by thermal evaporation under a pressure of 1.4×10<sup>-4</sup> Pa. The active area for all devices is 0.1 cm<sup>2</sup>.

*Device characterization:* The scanning electron microscope (SEM) images were obtained by using a Hitachi S-4800 field emission scanning electron microscopy. The UV-vis absorption spectra were measured with a PerkinElmer Lambda 650S spectrophotometer. The X-ray diffraction (XRD) patterns were carried out using a Bruker D8 ADVANCE XRD equipment. The current density-voltage (*J-V*) characteristics were carried out using Keithley 2400 under AM 1.5 G illumination (100 mW cm<sup>-2</sup>) from a solar simulator (Oriel Sol3A Class Solar Simulator). Steady-state photoluminescence (PL) and time-resolved PL (TRPL) were measured

with a Hamamatsu C12132 fluorescence lifetime spectrometer using a 1.5 ns pulsed laser (frequency 15 kHz) at an excitation wavelength of 479 nm and an excitation power of 1 mW. The incident photon to current efficiency (IPCE) spectra were carried out by QTest Station 500AD Solar Cell Quantum Efficiency System (CROWNTECH, INC). The X-ray photoelectron spectroscopy (XPS) spectra of perovskite films on ITO glass substrates were carried out by using PHI Quantera SXM (ULVAC-PHI). XPS measurements were tested in an ultrahigh-vacuum environment as low as  $5 \times 10^{-11}$  mbar. The ultraviolet photoelectron spectroscopy (UPS) was operated with a He discharged lamp (He I 21.22 eV, Kratos Axis Supra). The electrochemical impedance spectra (EIS) were studied with a CHI660 electrochemical workstation (CH Instrument Inc.), which were measured within a frequency range of  $10^5$ -1 Hz at 0.4 V under dark condition. The AFM spectra were measured with Dimension icon and the KPFM results were measured with MFP-3D Infinity AFM.

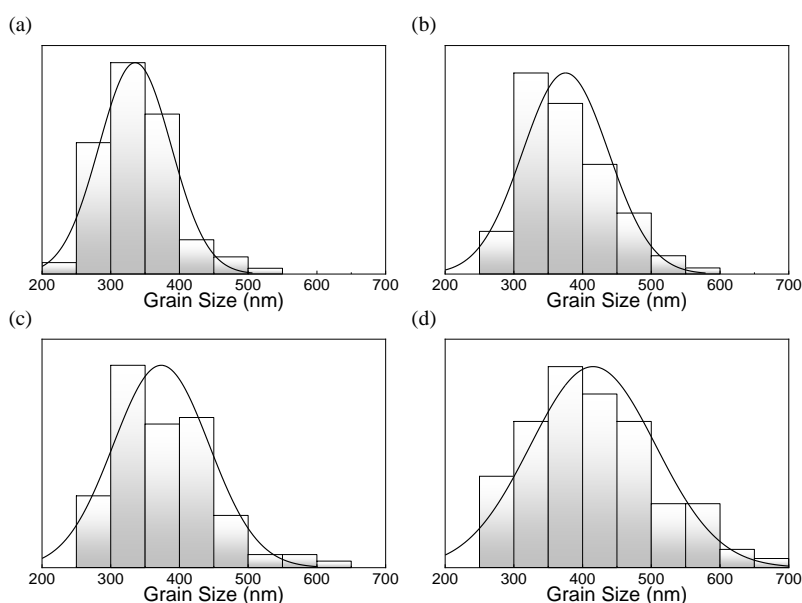

**Fig. S1** Grain size statistics of the pristine perovskite and AHBA-incorporated

perovskites with different doping concentration from top-view SEM images: (a) 0 mg/mL,  $331.28 \pm 3.61$  nm, (b) 0.25 mg/mL,  $359.22 \pm 10.07$  nm, (c) 0.5 mg/mL,  $364.01 \pm 10.50$  nm, and (d) 1 mg/mL,  $394.35 \pm 6.68$  nm.

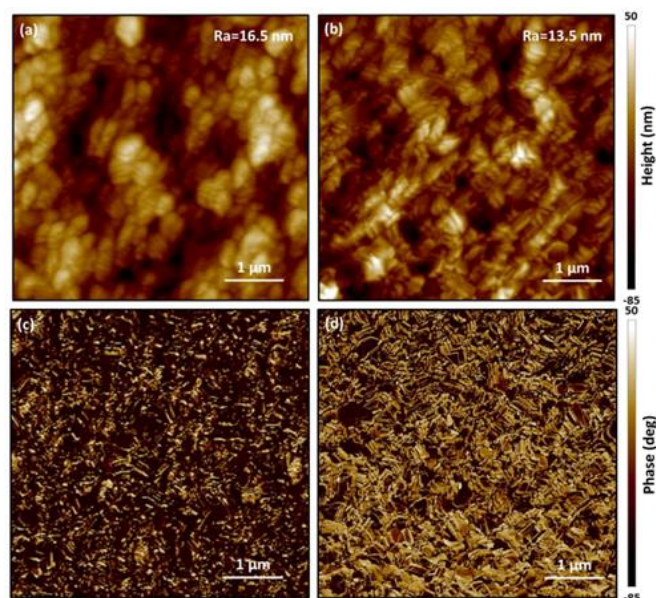

**Fig. S2** AFM images of (a, c) the pristine perovskite film and (b, d) the AHBA-doped perovskite film.

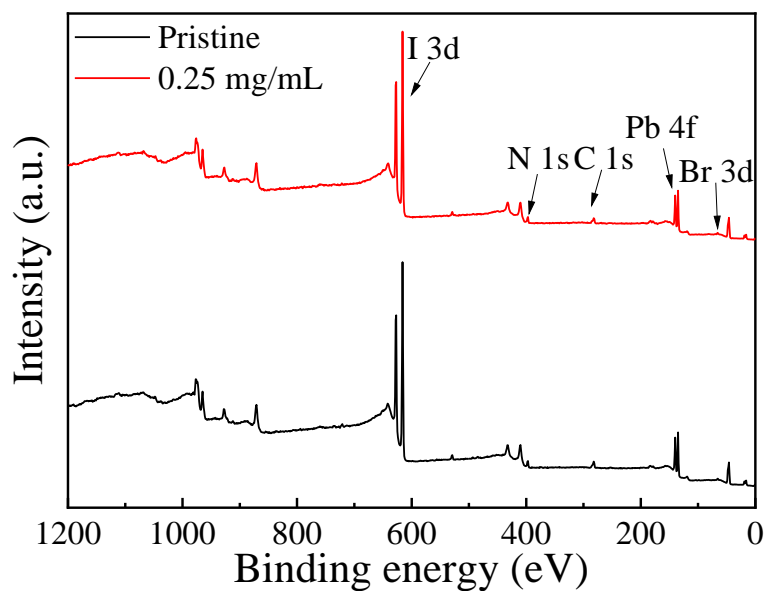

**Fig. S3** X-ray photoelectron spectroscopy (XPS). Survey spectra obtained from control perovskite and 0.25-mg/mL AHBA-added perovskite films.

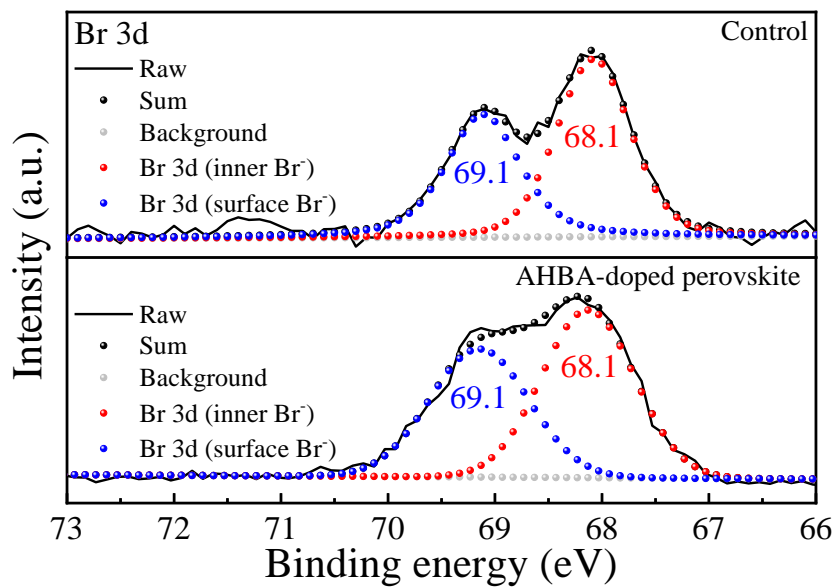

**Fig. S4** Br 3d XPS spectra of perovskite films with and without AHBA additive.

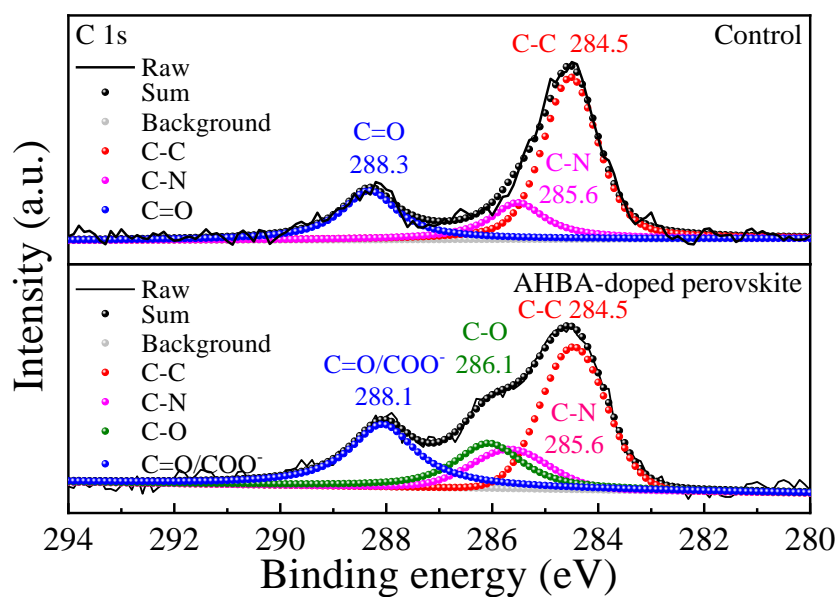

**Fig. S5** C 1s XPS spectra of perovskite films with and without AHBA additive.

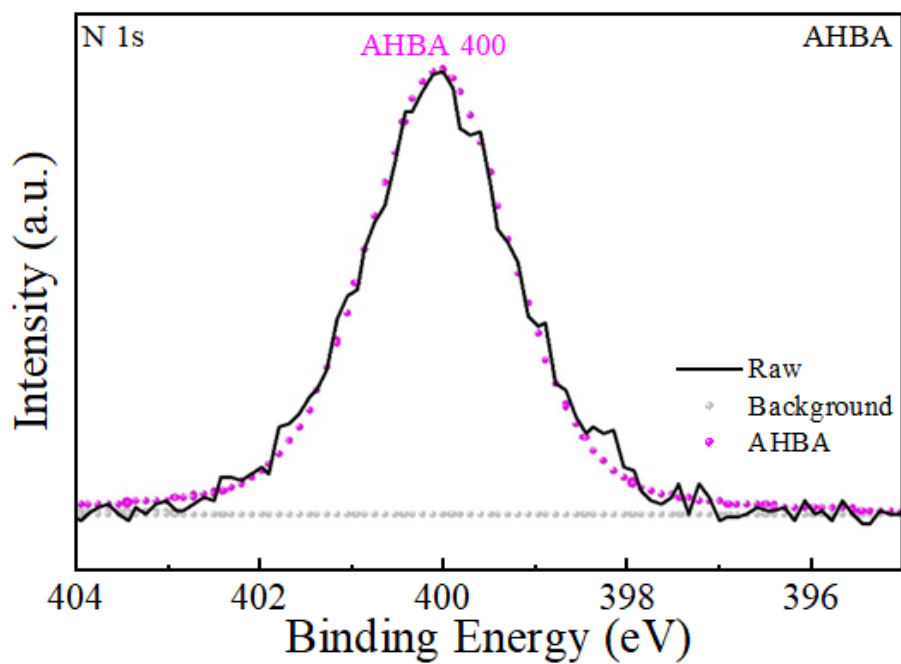

**Fig. S6** N 1s XPS spectra of AHBA.

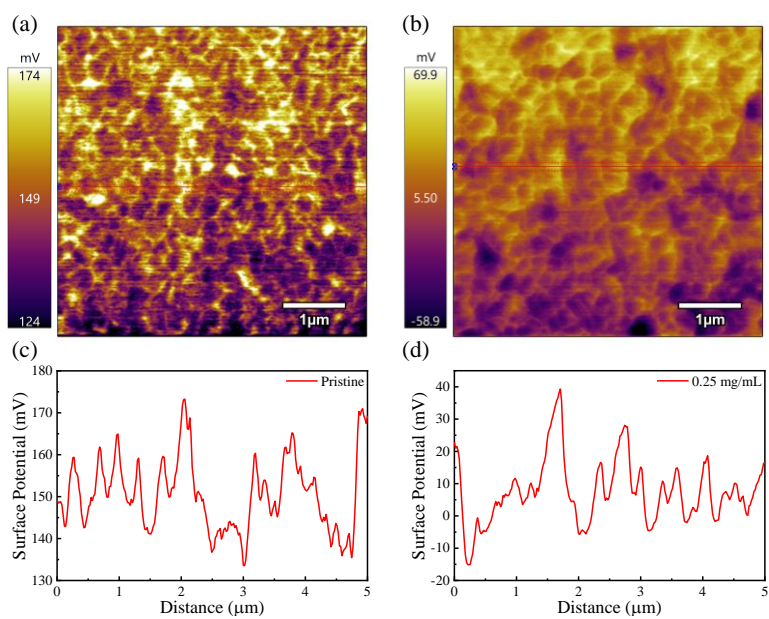

**Fig. S7** Kelvin Probe Force Microscopy of pristine perovskite and AHBA-doped perovskite.

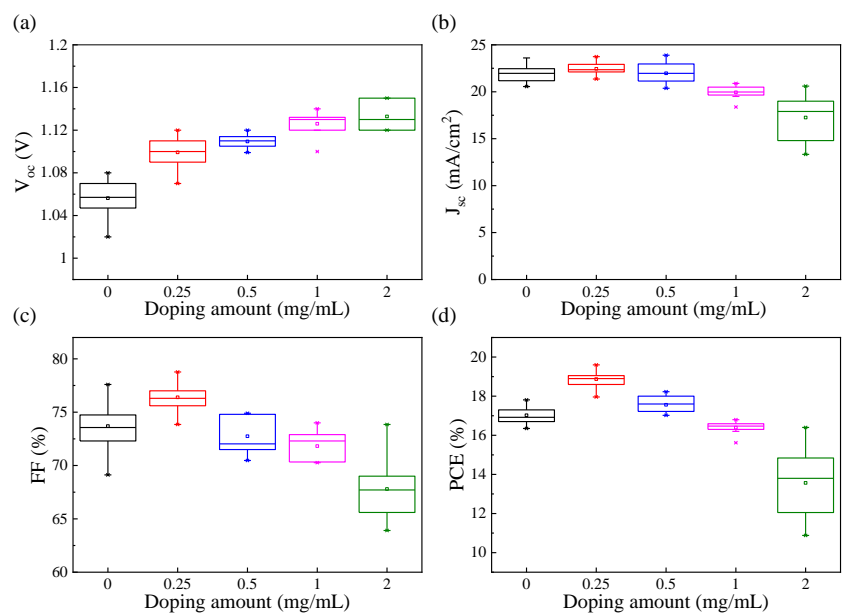

**Fig. S8** Statistical data for  $J_{SC}$ ,  $V_{OC}$ , FF and PCE obtained from 20 cells for each doping concentration.

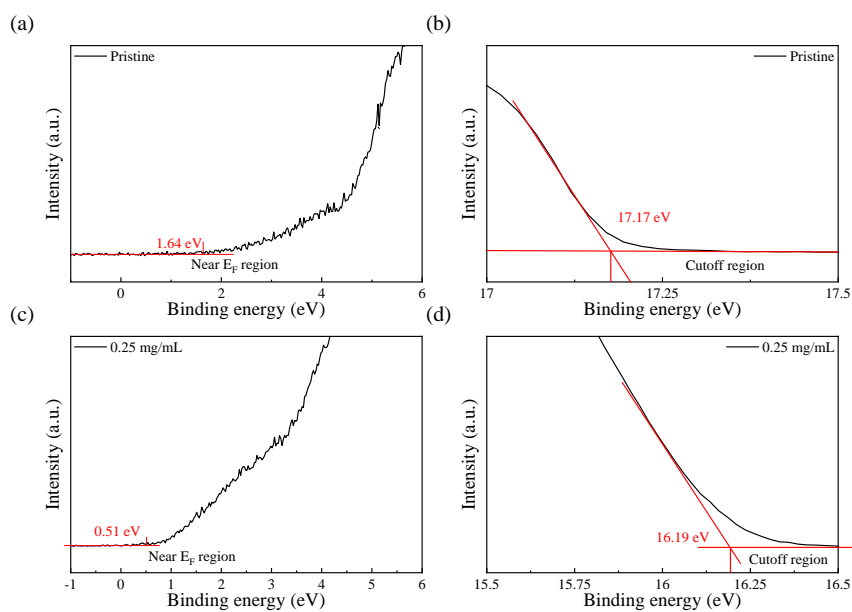

**Fig. S9** Helium I $\alpha$  ( $h\nu = 21.22$  eV) spectra of secondary electron cutoff and valence band of control and AHBA-incorporated perovskite films.



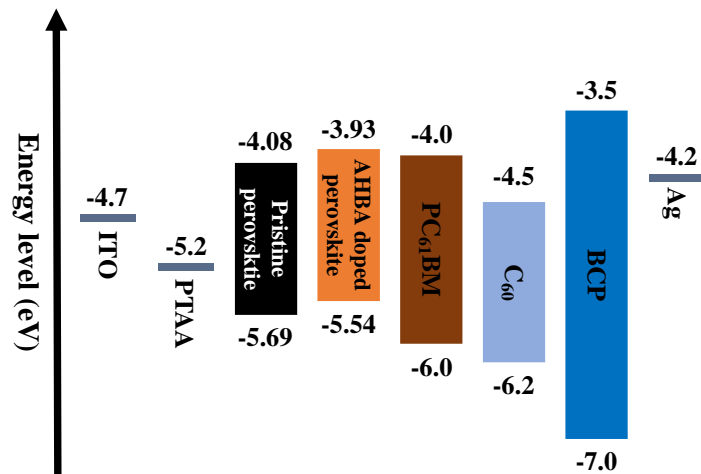

**Fig. S10** Schematic illustration of energy levels for the PSCs.

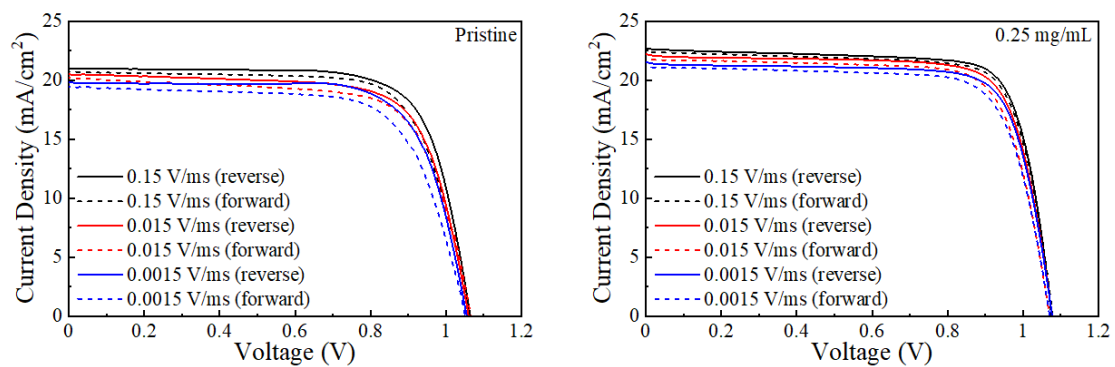

**Fig. S11** *J-V* curves of the PSCs under different scan rates.

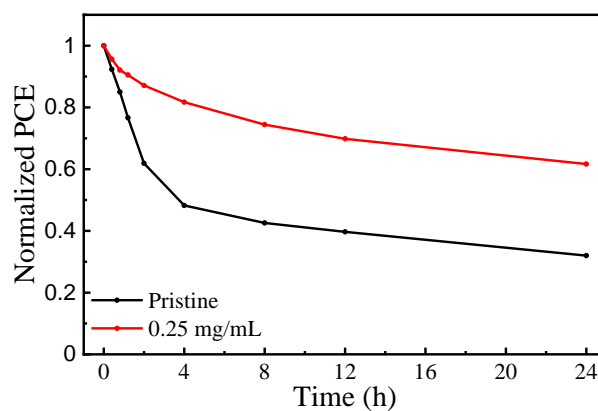

**Fig. S12** The stability of PSCs under AM 1.5G one sun constant illumination (unencapsulated, 20-30% RH).

**Table S1** Fitted photoluminescence lifetimes for pristine and 0.25 mg/mL AHBA-added perovskite films with a bi-exponential decay model. Here,  $A_1$  and  $A_2$  are fractional intensities, and  $\tau_1$  and  $\tau_2$  are lifetimes. The average carrier lifetime ( $\tau_{avr}$ ) was calculated with  $\tau_{avr} = A_1\tau_1 + A_2\tau_2$ .

| Sample   | $\tau_1$ (ns)/ $A_1$ (%) | $\tau_2$ (ns)/ $A_2$ (%) | $\chi^2$ | $\tau_{avr}$ (ns) |
|----------|--------------------------|--------------------------|----------|-------------------|
| Pristine | 13.43/19.28              | 79.71/80.72              | 1.106    | 66.93             |
| AHBA     | 10.00/1.75               | 164.13/98.25             | 1.204    | 161.43            |

**Table S2** The photovoltaic parameters of PSCs under different J-V scan rates and the calculated hysteresis index (HI) values using the following formula:

$$HI (\%) = \frac{PCE_{reverse} - PCE_{forward}}{PCE_{reverse}} \times 100 \%$$

| Sample     | Scan Rate (V/ms) | Scan direction | $V_{oc}$ (V) | $J_{sc}$ (mA cm <sup>-2</sup> ) | FF (%) | PCE (%) | HI (%) |
|------------|------------------|----------------|--------------|---------------------------------|--------|---------|--------|
| Pristine   | 0.15             | forward        | 1.06         | 20.71                           | 73.11  | 16.05   | 3.25%  |
|            |                  | reverse        | 1.06         | 20.96                           | 74.67  | 16.59   |        |
|            | 0.015            | forward        | 1.06         | 20.22                           | 70.68  | 15.15   | 3.50%  |
|            |                  | reverse        | 1.07         | 20.49                           | 71.61  | 15.70   |        |
|            | 0.0015           | forward        | 1.05         | 19.46                           | 69.79  | 14.26   | 6.61%  |
|            |                  | reverse        | 1.05         | 19.81                           | 73.41  | 15.27   |        |
| 0.25 mg/mL | 0.15             | forward        | 1.08         | 22.44                           | 76.79  | 18.61   | 1.59%  |
|            |                  | reverse        | 1.08         | 22.68                           | 77.20  | 18.91   |        |
|            | 0.015            | forward        | 1.08         | 21.77                           | 75.96  | 17.86   | 2.24%  |
|            |                  | reverse        | 1.08         | 22.19                           | 76.24  | 18.27   |        |
|            | 0.0015           | forward        | 1.07         | 21.11                           | 75.31  | 17.01   | 4.28%  |
|            |                  | reverse        | 1.08         | 21.54                           | 76.39  | 17.77   |        |
